# Supplementary material
Source: ML conference proceedings conference paper supplement (https://proceedings.neurips.cc/paper_files/paper/2018/hash/4b0250793549726d5c1ea3906726ebfe-Abstract.html)
Supplement: Supplementary file [file 4b0250793549726d5c1ea3906726ebfe-Supplemental.zip]

## 7 Appendix

**Lemma 1.**  $P$  and  $(1 - \beta)P + \beta\tilde{P}$  have the same stationary distribution  $\mu \quad \forall \beta \in [0, 1]$ .

*Proof.* It is known that  $P^\pi$  and  $\tilde{P}^\pi$  have the same stationary distribution. Using this fact we have that

$$\begin{aligned}\mu((1 - \beta)P^\pi + \beta\tilde{P}^\pi) &= (1 - \beta)\mu P^\pi + \beta\mu\tilde{P}^\pi \\ &= (1 - \beta)\mu + \beta\mu \\ &= \mu.\end{aligned}\tag{13}$$

□

**Property 2.** For a reward vector  $r$ , the MDP defined by the transition matrix  $P$  and  $(1 - \beta)P + \beta\tilde{P}$  have the same discounted average reward  $\rho$ .

$$\frac{\rho}{1 - \alpha} = \sum_i^\infty \gamma^i \pi^T r.\tag{14}$$

*Proof.* Using lemma 1, both  $P$  and  $(1 - \beta)P + \beta\tilde{P}$  have the same stationary distribution and so discounted average reward. □

**Lemma 2.** The convex combination of two row stochastic matrices is also row stochastic.

*Proof.* Let  $e$  be vector a columns vectors of 1.

$$\begin{aligned}(\beta P^\pi + (1 - \beta)\tilde{P}^\pi)e &= \beta P^\pi e + (1 - \beta)\tilde{P}^\pi e \\ &= \beta e + (1 - \beta)e \\ &= e.\end{aligned}\tag{15}$$

□

---

### Algorithm 2 Temporally regularized semi-gradient TD

---

- 1: Input: policy  $\pi, \beta, \gamma$
  - 2: **for all steps do**
  - 3:   Choose  $a \sim \pi(s_t)$
  - 4:   Take action  $a$ , observe  $r(s), s_{t+1}$
  - 5:    $\theta = \theta + \alpha(r + \gamma((1 - \beta)v_\theta(s_{t+1}) + \beta v_\theta(s_{t-1})) - v_\theta(s_t)) \nabla v_\theta(s_t)$
  - 6: **end for**
-

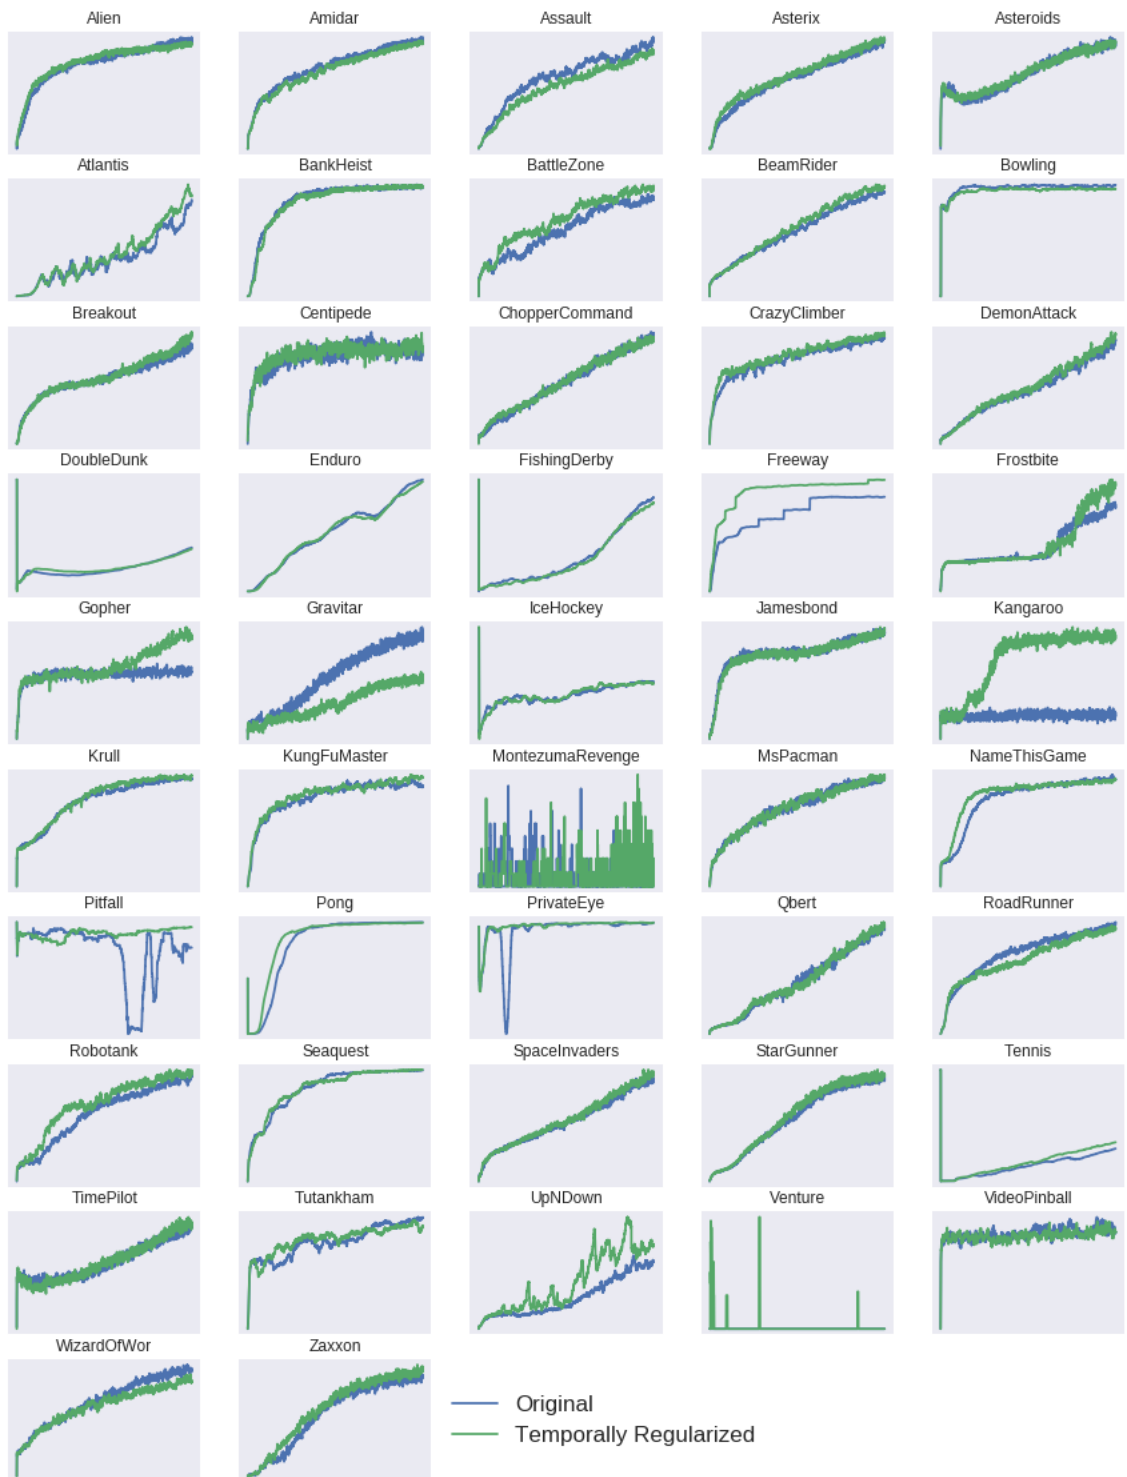

Figure 10: Average reward per episode on Atari games.
